# Supplementary material
Source: MDPI journal article supplement (https://www.mdpi.com/2073-4441/16/8/1172)
Supplement: s1 [file s1]

**Adsorptive Removal of Sb(V) from Wastewater by Pseudo-Boehmite: Performance and  
Mechanism**

**Yating He, Qiming Mao \*, Yaoyu Zhou, Xiande Xie and Lin Luo \***

College of Environment and Ecology, Hunan Agricultural University, Changsha 410128,  
China

Correspondence: qimingmao@126.com (Q.M.); linluo@hunau.edu.cn (L.L.)

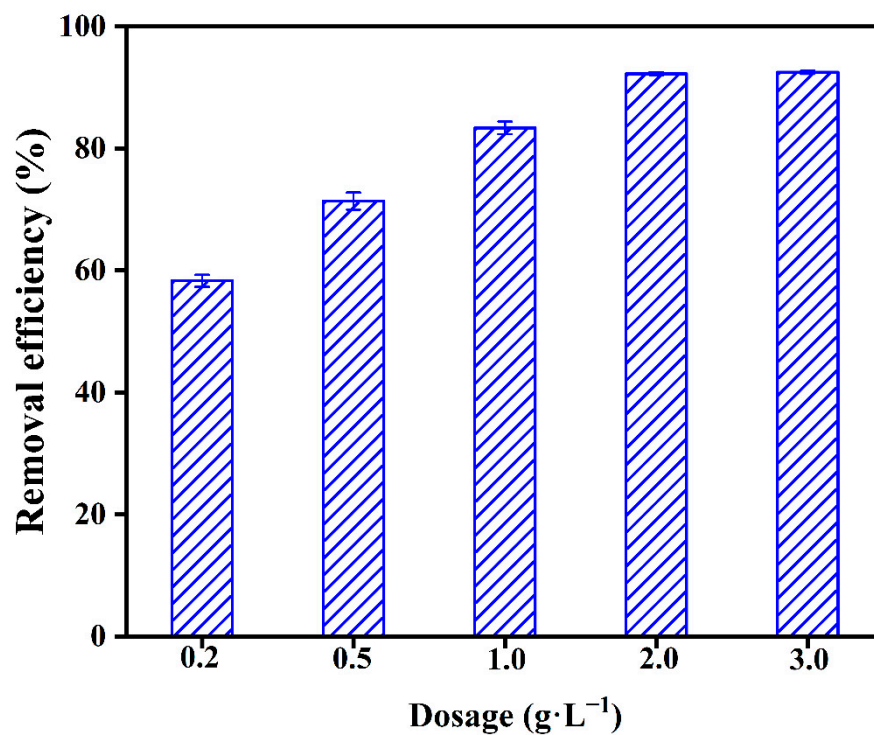

Figure S1. Effect of dosage on Sb(V) removal by the PB

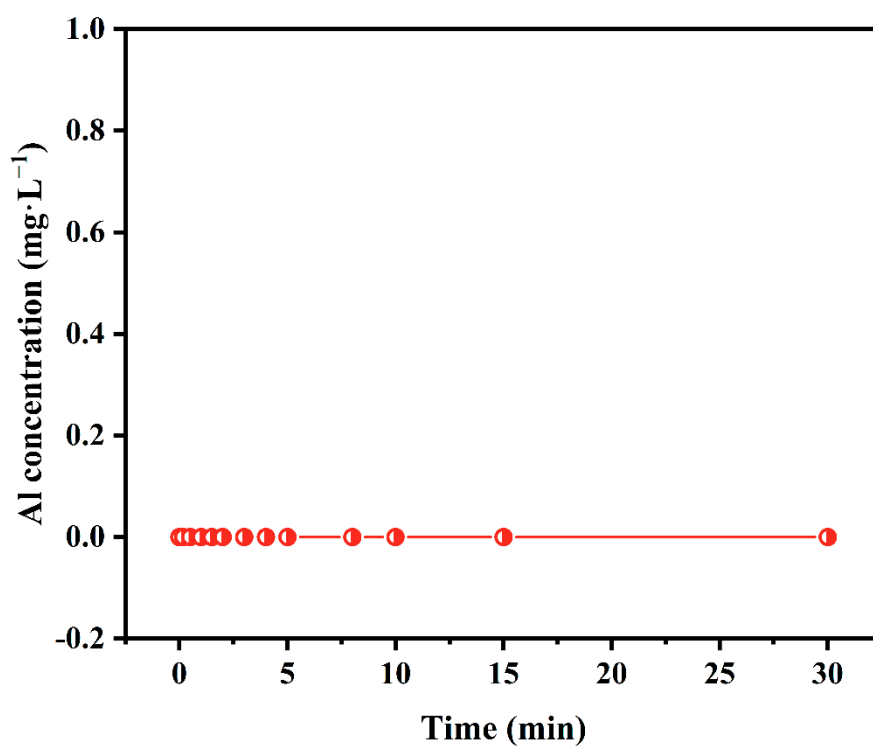

Figure S2. Leaching of aluminium ions during PB adsorption of Sb(V)

**Table S1** The abbreviation list

| Full Name                               | Abbreviation |
|-----------------------------------------|--------------|
| Pseudo-boehmite                         | PB           |
| Nano zero-valent iron                   | nZVI         |
| Deionized water                         | DW           |
| Scanning electron microscopy            | SEM          |
| Fourier Transform Infrared Spectroscopy | FTIR         |
| X-ray photoelectron spectroscopy        | XPS          |
| Dubinin-Radushkevich                    | D-R          |
